# Supplementary material for: Bimodal porous silica monoliths obtained by phase separation in non-aqueous media
Source: Royal Society of Chemistry journal article supplement (doi:10.1039/b918412k), 2009-12-10

**ELECTRONIC SUPPLEMENTARY INFORMATION**

**TO**

**Bicontinuous Macro-Mesoporous Silica Monoliths obtained by Phase Separation in Non Aqueous Media**

Jean Le Bideau,<sup>2\*</sup> M. Yusuf Miah,<sup>1</sup> André Vioux,<sup>1</sup> François Fajula,<sup>1</sup> and Anne Galarneau<sup>1\*</sup>

<sup>1</sup>Institut Charles Gerhardt Montpellier, UMR 5253 CNRS/UM2/ENSCM/UM1, ENSCM, 8 rue de l'Ecole Normale, 34296 Montpellier Cedex 5, France. <sup>2</sup>Institut des Matériaux Jean Rouxel (IMN) - UMR 6502 CNRS, Université de Nantes, 2 rue de La Houssinière, B.P. 32229, 44322 Nantes Cedex 3, France.

\*e-mail: anne.galarneau@enscm.fr; jean.lebideau@cnrs-immn.fr

## PREPARATION OF THE DIFFERENT MONOLITHS

### Preparation of silica monoliths from the system TMOS / PEO / FA

Silica monoliths were prepared exploring the system TMOS, PEO 10000 and FA using the molar ratios TMOS / FA / PEO at  $2 / 15.6 / y$ , with  $y$  corresponding to different EO/Si ratio between  $0.17 < \text{EO/Si} < 1.10$ . As an example, a bicontinuous monolith with a well-defined macroporosity was obtained with the following molar ratio:  $2 / 15.6 / 2.50 \cdot 10^{-3}$  corresponding to  $\text{EO/Si} = 0.28$ . First, 0.17 g of PEO 10000 was added in 4 mL of FA and stirred for 30 minutes at room temperature. Then 2 mL of TMOS was added slowly and the solution was stirred gently at room temperature. The resulting transparent solution was poured into a 5 mm internal diameter glass tube of 10 cm length; it is noteworthy that the surface of glass molds were prior hydrophobized with a 3 %v/v solution of dichlorodimethylsilane ( $(\text{CH}_3)_2\text{SiCl}_2$ ) in toluene followed by several successive washing in ethanol and toluene; this hydrophobization of the glass tubes avoided any interaction of the monolith with its mold and led to a smooth external surface of the silica monolith. Subsequently, the mold was sealed and kept in air at room temperature ( $22^\circ\text{C}$ ) for phase separation and sol-gel transition. The monolithic wet gels were obtained after few minutes (21 min for the ratio  $\text{EO/Si} = 0.28$ ) to 1 h depending on the polymer amount. The gels were then left for aging for 5 days at room temperature (or for 3 days at  $40^\circ\text{C}$ ). Some shrinkage occurred and wet silica monoliths of 4.5 mm diameter monoliths were obtained, released from their glass mold and washed in ethanol for 30 minutes at room temperature.

### Preparation of silica monoliths from the system TMOS / PEO / BMIM-TFSI / FA

Silica monoliths were prepared by adding ionic liquid as second additive to the polymer. Silica monoliths were then synthesized exploring the system TMOS, PEO 10000, BMIM-TFSI and FA using the molar ratios TMOS / FA / PEO / BMIM-TFSI in the range  $2 / 15.6 / 2.08 \cdot 10^{-3} (\text{EO/Si} = 0.23) / x$  with  $0.125 < x < 2.0$ . As an example, a bicontinuous monolith with a well-defined macroporosity was obtained for  $x = 2$ . First, 2.84 g BMIM-TFSI was added to 0.07 g PEO in presence of 2 mL FA and stirred gently at room temperature for 30-40 min. Then, 1 mL TMOS was added slowly and the mixture was stirred for several minutes at room temperature. The resulting transparent solution was poured into a 5 mm internal diameter glass mold. Subsequently, the mold was sealed and kept in air at  $40^\circ\text{C}$  for phase separation and sol-gel transition. The monolithic wet gels were obtained after few minutes (25 minutes at RT for  $x = 2$ ) to 2 h depending on the amount of BMIM-TFSI. The gels were then left for aging for 5 days at room temperature (or for 3 days at  $40^\circ\text{C}$ ). The same shrinking as previously of the monolithic gel occurred (from 5 to 4.5 mm), and wet monoliths were then released from their glass mold and washed in ethanol for 30 minutes at room temperature.

### Preparation of silica monoliths from the system TMOS / MTMS / FA / PEO / BMIM-TFSI

Silica monoliths were prepared by adding methyltrimethoxysilane (MTMS) together with TMOS to obtain functionalized silica surface. Silica monoliths were then synthesized exploring the system TMOS, MTMS, PEO 10000, BMIM-TFSI and FA using the molar ratios TMOS / MTMS / FA / BMIM-TFSI / PEO in the range  $1.75 / 0.25 / 15.6 / x / y$  with  $0.1 < \text{EO/Si} < 1.5$ . As an example, bicontinuous monoliths with a well-defined macroporosity were obtained for  $x = 0.25, 0.5, 0.7$  and  $y = 2.08 \cdot 10^{-3} (\text{EO/Si} = 0.23)$ . First, 1.98 g BMI-TFSI was added to 0.14 g PEO in presence of 4 mL FA and stirred gently at room temperature for 30-40 min. Then, 1.75 mL TMOS and 0.25 mL MTMS were added slowly and the mixture was stirred for several minutes at room temperature. The resulting transparent solution was poured into a 5 mm internal diameter glass mold. Subsequently, the mold was sealed and kept in air at  $40^\circ\text{C}$  for phase separation and sol-gel transition. The gels were then aged for 5 days at room temperature (or for 3 days at  $40^\circ\text{C}$ ). Wet monoliths were then released from their glass mold and washed in ethanol for 30 minutes at room temperature.

**Figure 4.** Characterization of a dried silica monolith synthesized from the mixture (2 TMOS / 15.6 FA / PEO with EO/Si = 0.28): (A) Mercury porosimetry, (B) Nitrogen sorption isotherm at 77 K, (C) TGA and (D) Nitrogen sorption isotherm at 77 K of monolith with (instead of silanization) an hydrothermal treatment at 125°C for 1 day with 0.1 M NH<sub>4</sub>OH.

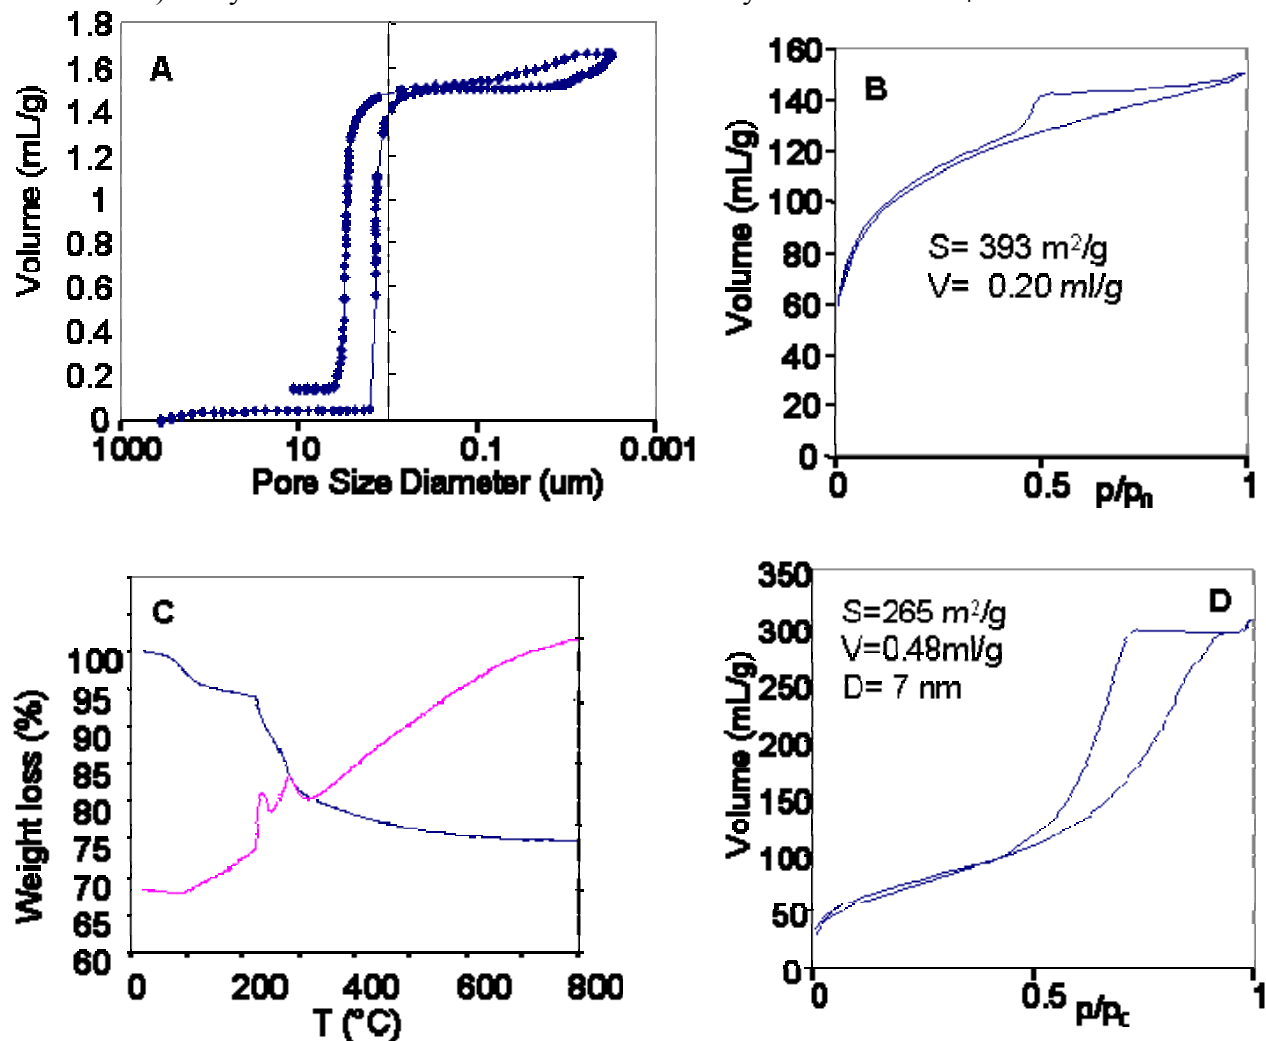

**Figure 5.** Characterization of a dried silica monolith synthesized from the mixture (2 TMOS / 15.6 FA / 2 BMI-TFSI / PEO with EO/Si = 0.23): (A) SEM picture, (B) Nitrogen sorption isotherm at 77 K, (C) Mercury porosimetry, (D) TGA.

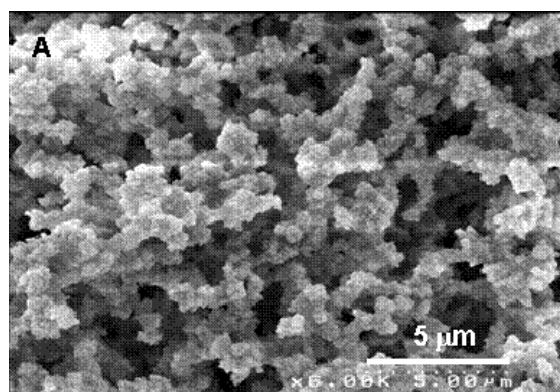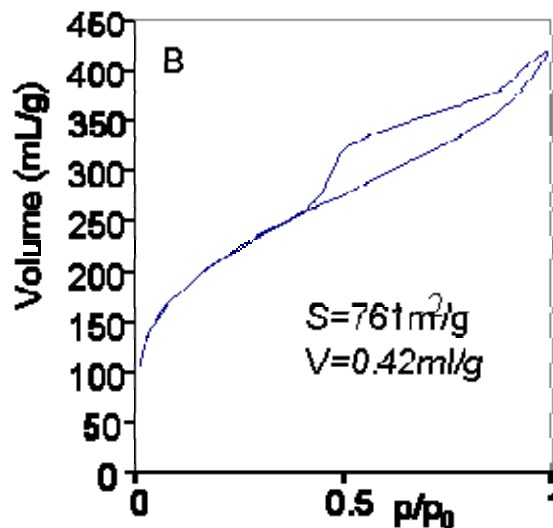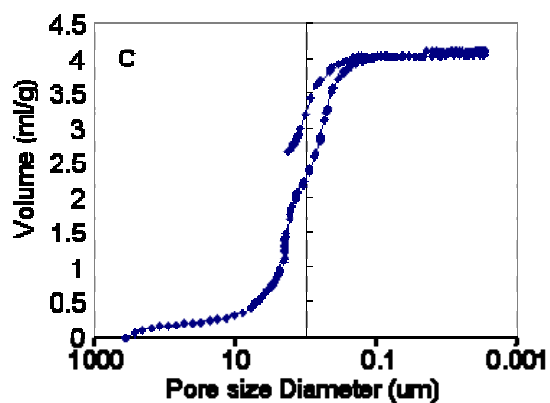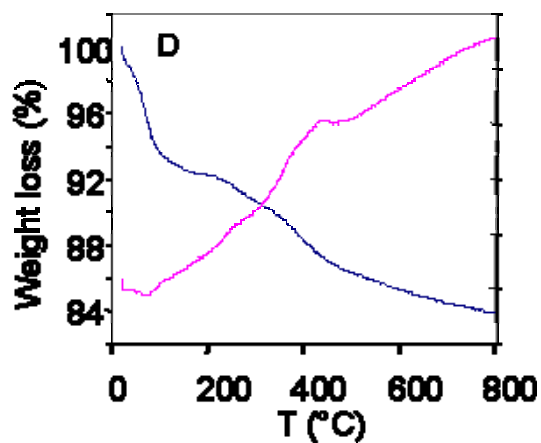

**Figure 6.** Characterization of a dried silica monolith synthesized from the mixture (1.75 TMOs / 0.25 MTMS / 15.6 FA / x BMI-TFSI / PEO with EO/Si = 0.23): (A) SEM picture for x = 0.5 and for x= 0.7 (B) Nitrogen sorption isotherm at 77 K, (C) Mercury porosimetry, (D) TGA.

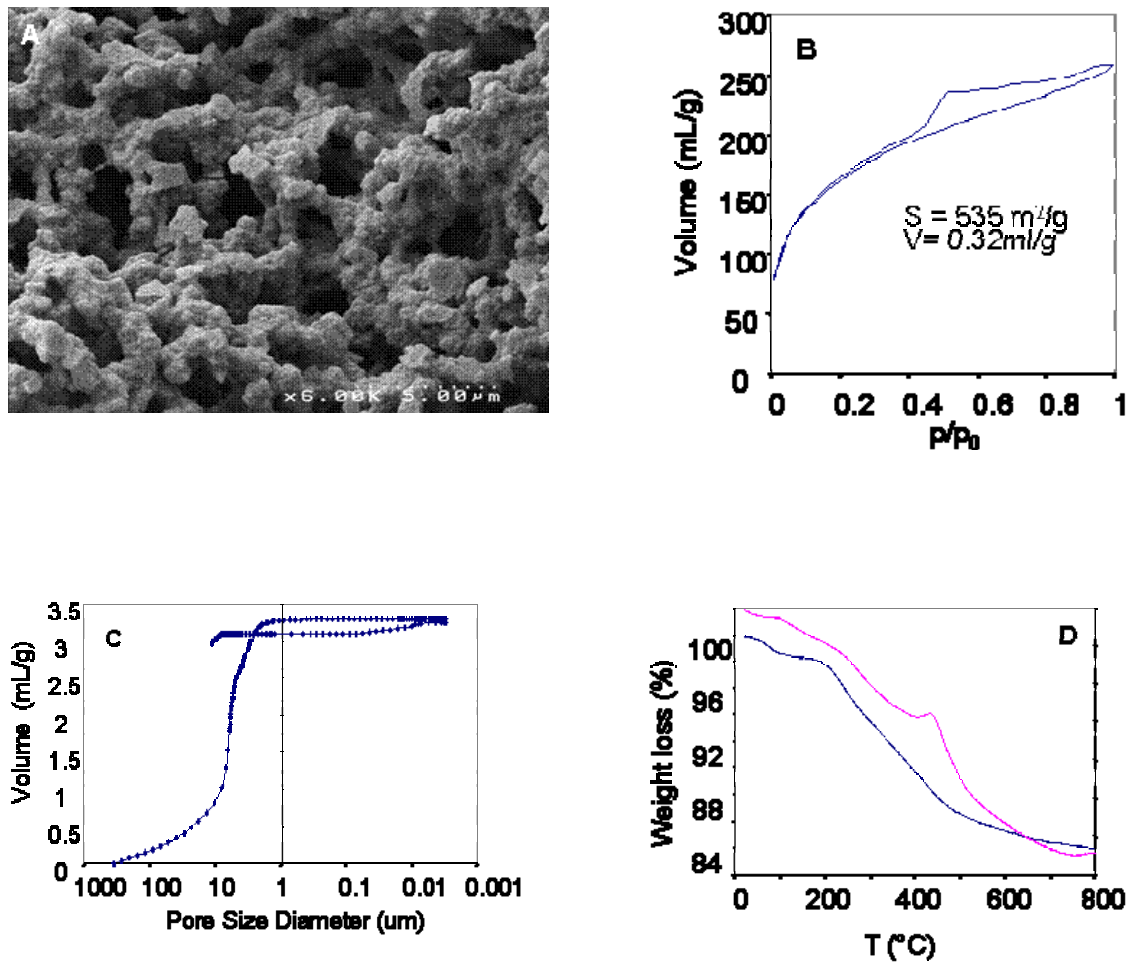

Supplement: b918412k.pdf [file b918412k.pdf]
